# Supplementary material for: Inhibition of Cell Proliferation and Cell Viability by Sinecatechins in Cutaneous SCC Cells Is Related to an Imbalance of ROS and Loss of Mitochondrial Membrane Potential
Source: MDPI journal article supplement (doi:10.3390/antiox11071416), 2022-07-21
Supplement: s1 [file s1]

# Supplementary Materials: Inhibition of Cell Proliferation and Cell Viability by Sin catechins in Cutaneous SCC Cells Is Related to an Imbalance of ROS and Loss of Mitochondrial Membrane Potential

Jiaqi Zhu <sup>1,2</sup>, Bernd Gillissen <sup>3</sup>, Dieu Linh Dang Tran <sup>1,4</sup>, Stefanie May <sup>1</sup>, Claas Ulrich <sup>1</sup>, Eggert Stockfleth <sup>5</sup> and Jürgen Eberle <sup>1,\*</sup>

<sup>1</sup> Skin Cancer Centre Charité, Department of Dermatology and Allergy, Charité–Universitätsmedizin Berlin, Charitéplatz 1, 10117 Berlin, Germany; jiaqi.zhu@charite.de (J.Z.); tran-dieu-linh.dang@charite.de (D.L.D.T.); stefanie.may@charite.de (S.M.); claas.ulrich@charite.de (C.U.)

<sup>2</sup> Department of Gynecology and Obstetrics, Jilin University, 130001 Changchun, China

<sup>3</sup> Department of Hematology, Oncology, and Tumor Immunology, Charité–Universitätsmedizin Berlin, 13125 Berlin, Germany; bernhard.gillissen@charite.de

<sup>4</sup> Beuth-Hochschule für Technik Berlin–University of Applied Sciences, Luxemburger Str. 10, 13353 Berlin, Germany

<sup>5</sup> Dermatologie, Venerologie und Allergologie, Klinikum Bochum, Ruhr-Universität Bochum, Gudrunstr. 56, 44791 Bochum, Germany; e.stockfleth@klinikum-bochum.de

\* Correspondence: juergen.eberle@charite.de; Tel.: +49-30-450-518-383

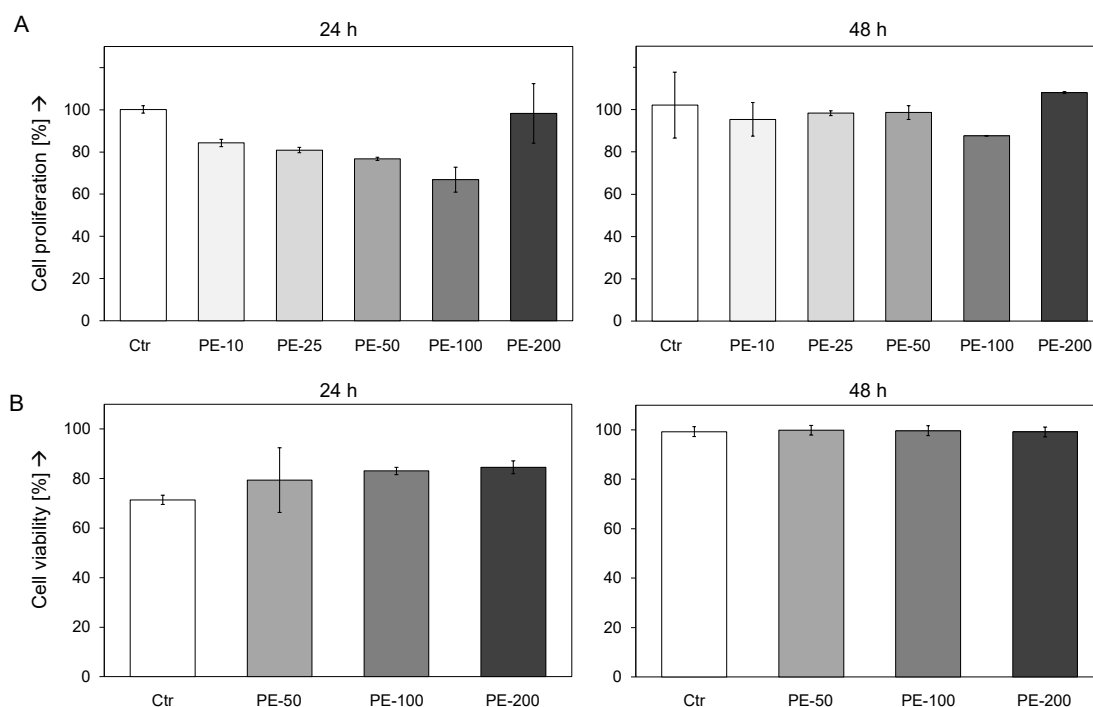

**Figure S1.** MRC-5 cells (human fetal lung fibroblast cells) were seeded and treated in an identical way as cSCC cells. Cell proliferation (A, WST-1 assay) and cell viability (B, calcein staining) were performed at 24 h and at 48 h, respectively. Mean values and SDs were calculated for 6 (A) and 4 (B) individual wells.
